# Supplementary material for: Priority setting of vaccine introduction in Bangladesh: a multicriteria decision analysis study
Source: BMJ Open. 2022 Feb 28;12(2):e054219. doi: 10.1136/bmjopen-2021-054219 (PMC8886403; doi:10.1136/bmjopen-2021-054219)
Supplement: Supplementary data [file bmjopen-2021-054219supp001.pdf]

**SUPPLEMENTARY****Supplementary A: Data collection instrument of Workshop A - Ranking of criteria**

Name of the participants: \_\_\_\_\_

Designation: \_\_\_\_\_

Organization: \_\_\_\_\_

**Note: Pls. make rank of the following criteria - 1 to 10 (Where is the most important and 10 is the less important)**

| CRITERIA                                                | DEFINITION                                                                                                                                                                          | RANK |
|---------------------------------------------------------|-------------------------------------------------------------------------------------------------------------------------------------------------------------------------------------|------|
| <b>Criteria of Disease</b>                              |                                                                                                                                                                                     |      |
| Case fatality rate                                      | Percentage of death among the cases                                                                                                                                                 |      |
| Incidence rate of disease                               | Number of new cases per 100,000 population per year                                                                                                                                 |      |
| Outbreak potentiality                                   | Potentiality of the disease to be epidemic<br>Potentiality will be measured by the reproduction of the disease                                                                      |      |
| Severity of disease                                     | Symptoms of the disease; how severe the disease are in the most of the cases                                                                                                        |      |
| Size of population at risk                              | Size of the population at risk or the target population for vaccination                                                                                                             |      |
| Type of Target population/<br>Demographic consideration | Demographic consideration or Target population for the vaccination against the disease (e.g. children or female or adult)                                                           |      |
| <b>Criteria of Vaccine</b>                              |                                                                                                                                                                                     |      |
| Cost-effectiveness                                      | Cost-effectiveness of vaccine; Incremental cost-effectiveness ration (ICER) will be \$/QALY gained or \$/DALY avoided if the vaccine introduced in comparison to the No vaccination |      |
| Vaccine efficacy                                        | Effectiveness of vaccine or the percentage reduction of diseases provided by vaccine                                                                                                |      |
| <b>Other Criteria</b>                                   |                                                                                                                                                                                     |      |
| Equity                                                  | Disease occur more in economically poor people or disadvantaged population                                                                                                          |      |
| Global Target                                           | Global agenda of eradication/ elimination/ control target                                                                                                                           |      |

Supplementary B: Data collection instrument of Workshop C - Ranking of vaccines

Name of the participants: \_\_\_\_\_  
Designation: \_\_\_\_\_  
Organization: \_\_\_\_\_

Please rank vaccines from 1-7, where 1 is most favourable and 7 is least favourable

|         | Criteria                                                                                                                                                         | Rotavirus                                                                                   | HPV                                                         | Cholera                                                  | JE                                                          | Typhoid                   | Influenza                                                                                                | Dengue                                                     |
|---------|------------------------------------------------------------------------------------------------------------------------------------------------------------------|---------------------------------------------------------------------------------------------|-------------------------------------------------------------|----------------------------------------------------------|-------------------------------------------------------------|---------------------------|----------------------------------------------------------------------------------------------------------|------------------------------------------------------------|
| DISEASE | 1. Incidence rate<br>Number of new cases per 100,000 population per year                                                                                         | 1080/100,000                                                                                | 24.3/100,000                                                | 210/100,000                                              | 2.7/100,000                                                 | 280/100,000               | 10,000/100,000 person year (2008)<br>6600/100,000 person year (2009)<br>17000/100,000 person year (2010) | 1340-5780/100,000 person-season                            |
|         | 2. Case fatality rate<br>Percentage of death among the cases                                                                                                     | 0.03%<br>12.42/100,000 among < 5 years of age (Rotavirus gastroenteritis mortality) (1.24%) | 1.8%<br>50%                                                 | 1.5%                                                     | 10-30% (25%)                                                | 0.3% (1%)                 | 0.08%                                                                                                    | 2.5%                                                       |
| VACCINE | Type of vaccine                                                                                                                                                  | RV5; Live attenuated                                                                        | Human Papillomaviruses Nanovalent                           | Shanchol                                                 | SA14-14-2 JE Vaccine                                        | Typhoid Conjugate vaccine | Influenza trivalent vaccine: Single dose                                                                 | Dengvaxia live attenuated, recombinant tetravalent vaccine |
|         | Dosage                                                                                                                                                           | 3 dosages                                                                                   | 2 dosages                                                   | 2 dosages                                                | Single dose                                                 | Single dose               | Single dose                                                                                              | 3 dosages                                                  |
| IN      | 3. Vaccine efficacy<br>Effectiveness of vaccine or the percentage reduction of diseases provided by vaccine                                                      | 55% (40-85%)                                                                                | 90-100%                                                     | 50-60%                                                   | 95% >85%                                                    | 50-72%                    | 40% 40-60%                                                                                               | 66%                                                        |
| POL     | 4. Type of Target population<br>Demographic consideration or Target population for the vaccination against the disease (e.g. children or female or adult)        | Under 5 population                                                                          | Girls of 10 years of age or class 5 student<br>1.54 million | 1-5years of population<br>Urban and high risk population | 1-15 years of children;<br>Routine immunization 9-12 months | Under 5 population        | High risk group                                                                                          | Dhaka City population                                      |
| ATTION  | 5. Size of population at risk (million)<br>Number of population need to be vaccinated or size of the population at risk or the target population for vaccination | 15.17                                                                                       | 9.17<br>1.54                                                | 13.3                                                     | 7.4 (1-15 years of children)                                | 15.17                     | 15.47                                                                                                    | 2.18                                                       |
|         | RANK                                                                                                                                                             |                                                                                             |                                                             |                                                          |                                                             |                           |                                                                                                          |                                                            |
